# Supplementary material
Source: Springer Nature journal article supplement (https://www.springermedizin.de/resource/supplementary/12963_2010_137_MOESM1_ESM.pdf/9572734)

# Eigenvalues for one to eight factor solutions

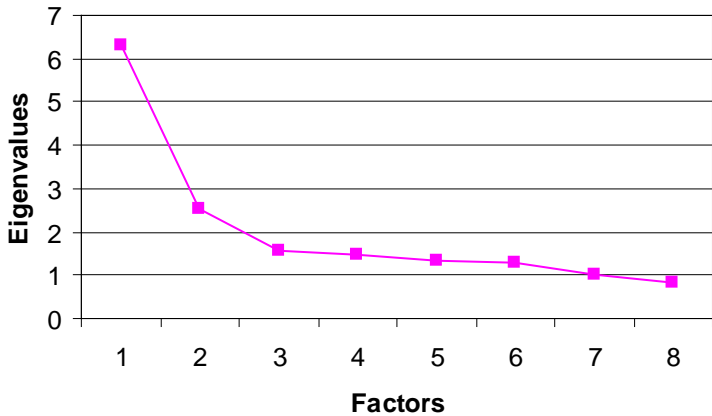

Supplement: MOESM1 [file 9572734]
